# Supplementary material for: Hypoxia Induces Escape from Innate Immunity in Cancer Cells via Increased Expression of ADAM10: Role of Nitric Oxide
Source: Oxford University Press journal article supplement (doi:10.1158/0008-5472.can-11-2104), 2011-10-18
Supplement: 00085472can112104-sup-figure_6_pdf_62k.pdf [file 00085472can112104-sup-figure_6_pdf_62k.pdf]

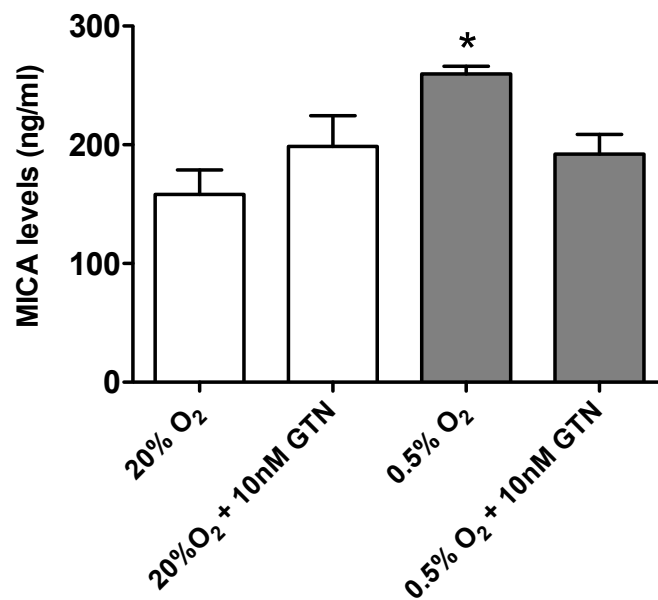

**Supplementary Figure 6.** Low concentrations of nitroglycerin (GTN; 10 nM) inhibit the release of MICA in the culture medium of DU145 cells (\* $P < 0.05$ , ANOVA followed by Bonferroni *post hoc* test). These results confirm our previous findings revealing similar outcomes (Siemens *et al.* Cancer Res. 68: 4746-4753, 2008). For the current study, this experiment was conducted once in replicates of three culture plates.
